# Supplementary material for: Biomechanics of swimming in developing larval fish
Source: Oxford University Press journal article supplement (doi:10.1242/jeb.149583), 2018-01-01
Supplement: jeb149583supp.pdf [file jeb149583supp.pdf]

## Supplementary Dataset 1

[Click here to Download Dataset 1](#)
